# Supplementary material
Source: publisher site journal article supplement (https://www.dovepress.com/article/606977)
Supplement: Supplementary file 1 [file 606977%20Supplementary.docx]

**Supplementary materials**

**Supplementary Methods**

Participants

Participants with a score ≥ 16 in the COPD Screening Questionnaire (COPD-SQ) were invited to undergo a detailed baseline health questionnaire and spirometry. Subjects with a post-bronchodilator forced expiratory volume in 1 second to forced vital capacity (FEV1/FVC) ratio of less than 0.7 were subsequently invited to undergo self-management education and follow-up every three months. To guarantee consistency and uniformity of data among all participating centers, a central coordinating center was set up. The center formulated a thorough data management strategy, which included guidelines for data gathering, quality assurance, and standardization. Ongoing communication and cooperation with participating centers were upheld throughout the research. Training workshops were carried out nationally and regionally for all healthcare workers involved in the program to maintain a uniform data collection method. Trained and certified technicians at the recruitment sites tested the lung function of all participants before and after bronchodilator inhalation (400 μg salbutamol), with measurement results subjected to quality-control checks by an expert panel according to criteria from the American Thoracic Society and European Respiratory Society.1 As a result, a total of 3913 patients with COPD were included, the selection chart of which was described previously.2

Measures

This study is a prospective cohort study that utilizes the baseline data and one-year follow-up data obtained from the Enjoying Breathing Subject selection of this study have been reported elsewhere.2 Briefly, participants aged 40 years and older, enrolled between May 2020 and April 2024 from 17 provinces from China, including (Heilongjiang, Liaoning, Inner Mongolia, Hebei, Shanxi, Gansu, Beijing, Tianjin, Shandong, Jiangsu, Zhejiang, Henan, Hunan, Sichuan, Chongqing, Shaanxi, and Guizhou). Participants were underwent evaluation of diagnosis of COPD according to Chronic Obstructive Lung Disease (GOLD) 2020,3 which defines COPD as post-bronchodilator FEV1/FVC ratio of less than 0.7.

At baseline, this study included measures of age, sex, body mass index (BMI), number of family members, geographical region, smoking status, residence, education, occupation, biomass exposure, COPD therapy, self-reported comorbidities, and self-reported exacerbations for COPD in the previous 12 months.2 In this research, five most prevalent comorbidities including asthma, bronchiectasis, hypertension, coronary artery disease, and diabetes mellitus were selected for comparisons between non-smoking and smoking patients with COPD.2

After one-year follow-up, to determine the occurrence of Hospitalizations for COPD episodes, the following open-ended question was asked in the follow-up interview: “Have you ever experienced COPD exacerbation for COPD that necessitates Hospitalizations in the previous 3 months”, “How many episodes did it occur”, “How many days did you stay in the hospital during the Hospitalizations for COPD exacerbation”. Hospitalized medical records were checked by healthcare workers when necessary. All patients included at baseline received at least one year of follow-up, except for three individuals (one non-smoker and two smokers), who were also included in the data analysis. These three patients without follow-up were categorized as having no exacerbations when included in the follow-up data analysis.

BMI was analyzed both as a continuous variable and in categories: underweight (< 18.5 kg/m²), normal weight (18.5-24.9 kg/m²), overweight (25.0-27.9 kg/m²), and obese (≥ 28.0 kg/m²). Age was also assessed as both a continuous and categorical variable, divided into five groups: < 50, 50-59, 60-69, 70-79, and ≥ 80 years. Household size was grouped into four categories: individuals living alone, two-person households, small households with 3-5 members, and large households with more than five members.2 We categorized smoking status into non-smoking and smoking categories for clarity and analysis. “Non-smokers” are individuals who have never smoked throughout their entire lives; “smokers” refers to individuals who have smoked at some point in their lives, including current smokers and former smokers.4 The “total LHS” during follow-up refers to the sum of days stayed in the hospital, categorized as 0, 1-10, 11-20, and ≥ 20 days.

**
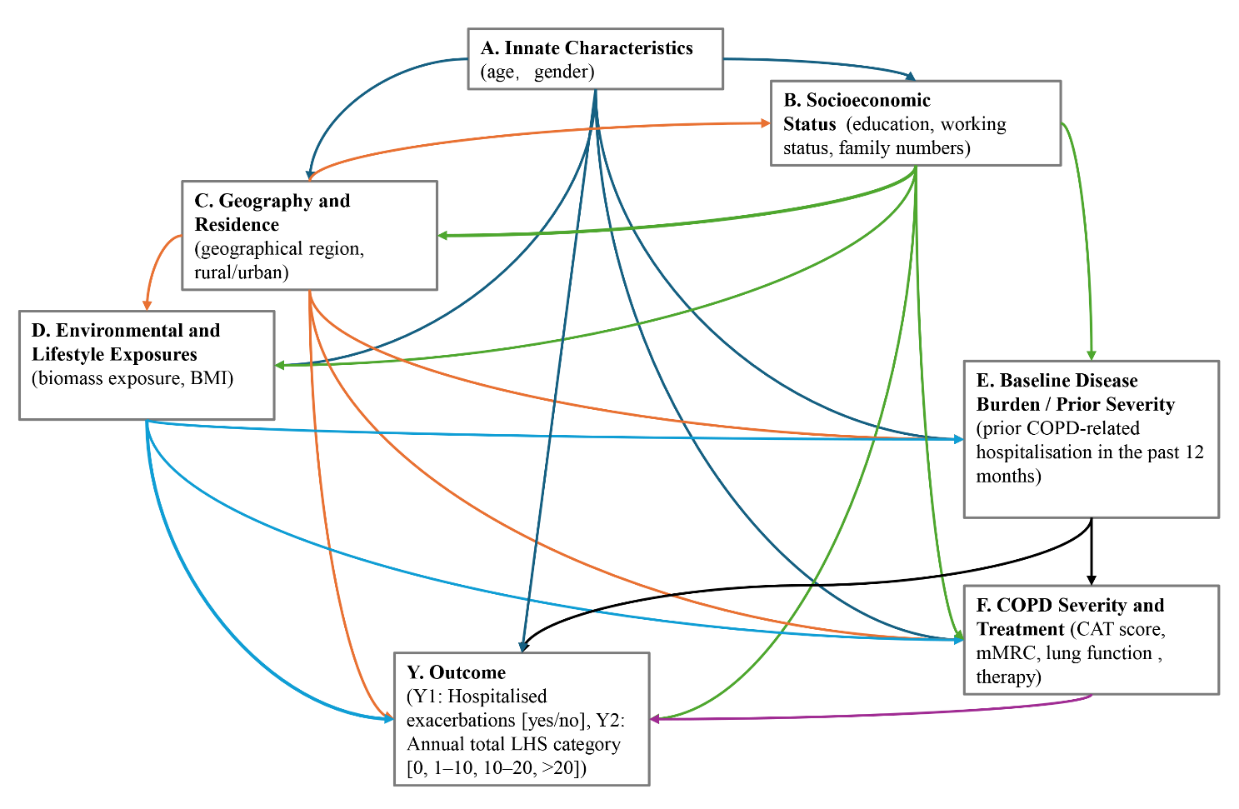
Supplementary Figure S1 Directed acyclic graph (DAG) illustrating the assumed causal structure underlying the associations between sociodemographic, environmental, and clinical factors and hospitalized exacerbations in COPD.**

The DAG presents the hypothesised relationships between innate characteristics (A: age, sex), socioeconomic status (B: education, working status, family size), geography and residence (C: geographical region, rural/urban setting), environmental and lifestyle exposures (D: biomass exposure, body mass index), baseline disease burden (E: prior COPD-related Hospitalizations in the past 12 months), COPD severity and treatment (F: CAT score, mMRC grade, lung function, and therapy), and study outcomes (Y: hospitalized exacerbations and annual total length of hospital stay). Arrows represent assumed causal directions based on clinical knowledge and prior literature. The DAG was used to identify exposure-specific minimal sufficient adjustment sets for estimating total effects while avoiding overadjustment and collider bias.

**
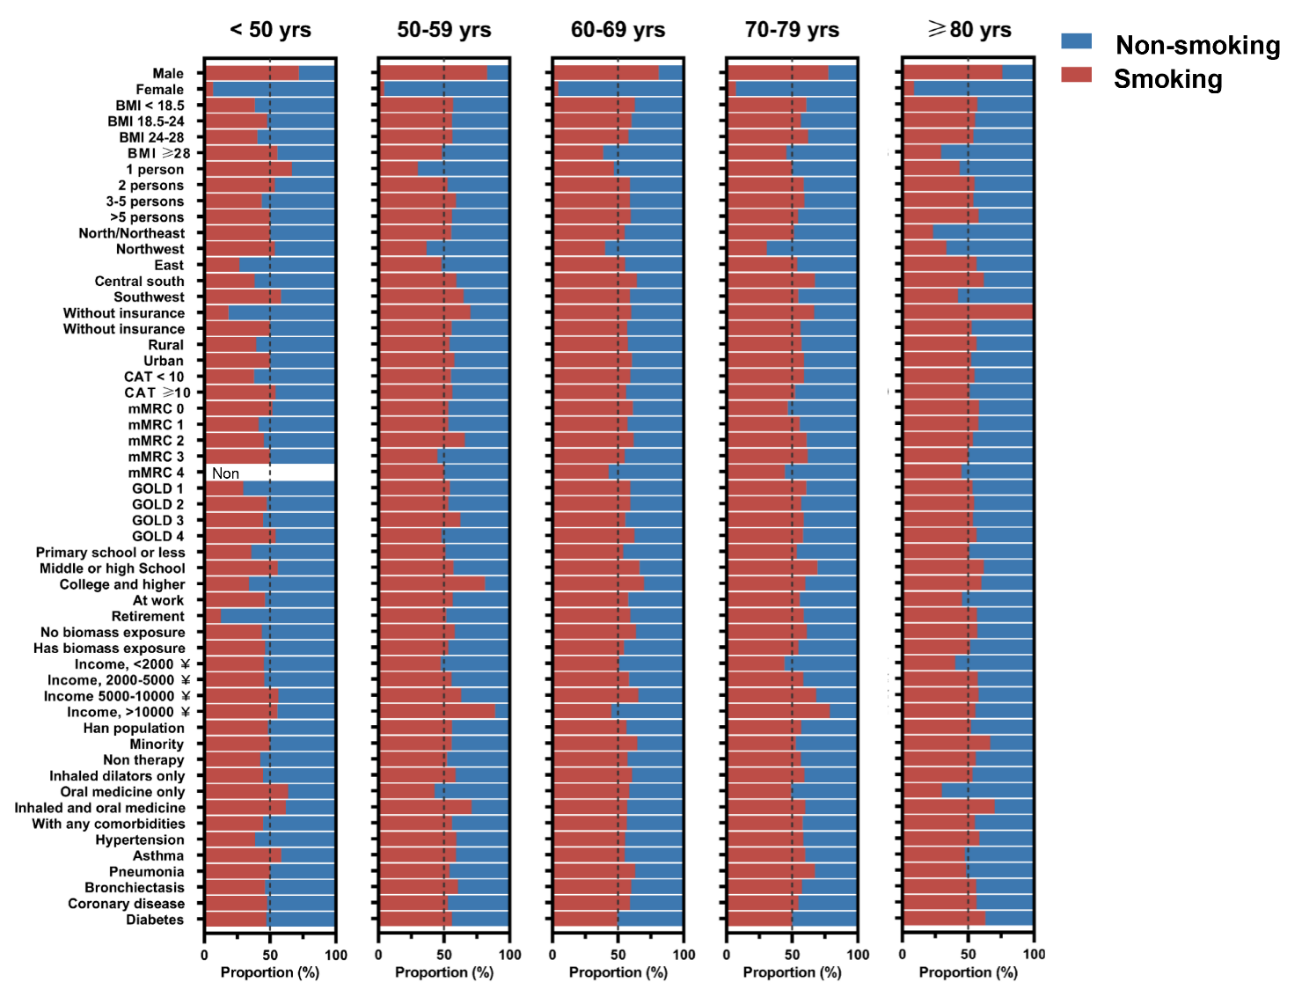
Supplementary Figure S2 The proportion of non-smoking and smoking status in patients with COPD across sociodemographic factors.**

The proportion of non-smoking and smoking status in patients with COPD across sociodemographic factors. The total population was divided into small subgroups based on age stratification (<50, 50-59, 60-60, 70-79, ≥80 years), and the proportion was calculated for each subgroup. BMI, body mass index; mMRC, Modified Medical Research Council; and GOLD, Global Initiative for Chronic Obstructive Lung Disease; yrs, years. Annotation of the colors: dark red for the proportion of smoking status, dark blue for the proportion of non-smoking status.

**
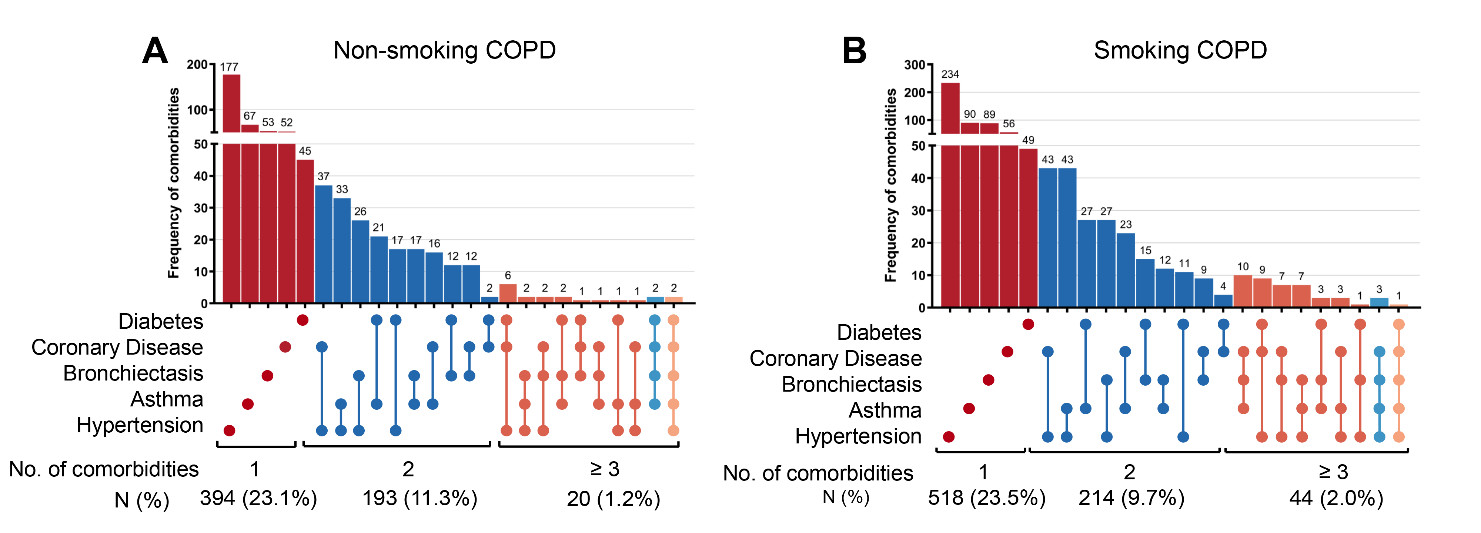
Supplementary Figure S3 Upset plots showed the patterns of comorbidities clusters in non-smoking and smoking COPD patients at baseline.**

Upset plots showed the patterns of comorbidities clusters based on the top five most common comorbidities in non-smoking (A) and smoking (B) COPD patients at baseline. Annotation of the colors as follows (from left to right): dark red for patients with one comorbidity, dark blue for patients with two comorbidities, red for patients with three comorbidities, blue for patients with four comorbidities, and light red for patients with five comorbidities.

**Supplementary Table S1 Characteristics for prior 12-month hospitalized AE among COPD patients at baseline.**

| **Variables** | **Non-smoking COPD (n=1709) *** | |  |  | **Smoking COPD (n=2204) *** | |  |
| --- | --- | --- | --- | --- | --- | --- | --- |
| **Without hospitalized AE (n=1186, 69.4%)** | **With hospitalized AE (n=523, 30.6%)** | ***P* value** |  | **Without hospitalized AE (n=1462, 66.3%)** | **With hospitalized AE (n=742, 33.7%)** | ***P* value** |
| **Ages, years, mean ± SD** | 64.64 ± 12.32 | 69.78 ± 10.98 | **<0.001** |  | 65.21 ± 11.01 | 70.42 ± 9.39 | **<0.001** |
| **Age stratification, years** |  |  | **<0.001** |  |  |  | **<0.001** |
| <50 | 141 (11.89%) | 23 (4.40%) |  |  | 122 (8.34%) | 13 (1.75%) |  |
| 50-59 | 229 (19.31%) | 64 (12.24%) |  |  | 285 (19.49%) | 81 (10.92%) |  |
| 60-69 | 376 (31.70%) | 162 (30.98%) |  |  | 531 (36.32%) | 231 (31.13%) |  |
| 70-79 | 331 (27.91%) | 173 (33.08%) |  |  | 402 (27.50%) | 289 (38.95%) |  |
| ≥80 | 109 (9.19%) | 101 (19.31%) |  |  | 122 (8.34%) | 128 (17.25%) |  |
| **Gender** |  |  | **0.001** |  |  |  | 0.11 |
| Male | 365 (30.78%) | 202 (38.62%) |  |  | 1408 (96.31%) | 724 (97.57%) |  |
| Female | 821 (69.22%) | 321 (61.38%) |  |  | 54 (3.69%) | 18 (2.43%) |  |
| **BMI, kg/m2, mean ± SD** | 22.96 ± 3.84 | 21.99 ± 3.96 | **<0.001** |  | 22.53 ± 3.32 | 21.64 ± 3.48 | **<0.001** |
| **BMI stratification, kg/m2** |  |  | **<0.001** |  |  |  | **<0.001** |
| <18.5 | 120 (10.12%) | 82 (15.68%) |  |  | 160 (10.94%) | 131 (17.65%) |  |
| 18.5-24 | 639 (53.88%) | 328 (62.72%) |  |  | 844 (57.73%) | 435 (58.63%) |  |
| 24-28 | 324 (27.32%) | 86 (16.44%) |  |  | 382 (26.13%) | 150 (20.22%) |  |
| ≥28 | 103 (8.68%) | 27 (5.16%) |  |  | 76 (5.20%) | 26 (3.50%) |  |
| **Family numbers, person** |  |  | **<0.001** |  |  |  | **<0.001** |
| 1 | 58 (4.89%) | 12 (2.29%) |  |  | 40 (2.74%) | 22 (2.96%) |  |
| 2 | 462 (38.95%) | 136 (26.00%) |  |  | 612 (41.86%) | 197 (26.55%) |  |
| 3-5 | 495 (41.74%) | 297 (56.79%) |  |  | 617 (42.20%) | 424 (57.14%) |  |
| >5 | 112 (9.44%) | 57 (10.90%) |  |  | 139 (9.51%) | 84 (11.32%) |  |
| Not reported | 59 (4.97%) | 21 (4.02%) |  |  | 54 (3.69%) | 15 (2.02%) |  |
| **Geographical region** |  |  | **<0.001** |  |  |  | **<0.001** |
| North/Northeast | 249 (20.99%) | 31 (5.93%) |  |  | 272 (18.60%) | 34 (4.58%) |  |
| Northwest | 217 (18.30%) | 65 (12.43%) |  |  | 136 (9.30%) | 28 (3.77%) |  |
| East | 105 (8.85%) | 126 (24.09%) |  |  | 103 (7.05%) | 161 (21.70%) |  |
| Central south | 533 (44.94%) | 243 (46.46%) |  |  | 809 (55.34%) | 472 (63.61%) |  |
| Southwest | 82 (6.91%) | 58 (11.09%) |  |  | 142 (9.71%) | 47 (6.33%) |  |
| **Residence** |  |  | **<0.001** |  |  |  | **<0.001** |
| Rural | 654 (55.14%) | 388 (74.19%) |  |  | 776 (53.08%) | 531 (71.56%) |  |
| Urban | 532 (44.86%) | 135 (25.81%) |  |  | 686 (46.92%) | 211 (28.44%) |  |
| **CAT score, mean ± SD** | 13.27 ± 6.95 | 18.93 ± 6.36 | **<0.001** |  | 13.57 ± 6.56 | 18.32 ± 6.74 | **<0.001** |
| **mMRC grade** |  |  | **<0.001** |  |  |  | **<0.001** |
| **0** | 151 (12.73%) | 23 (4.40%) |  |  | 188 (12.86%) | 21 (2.83%) |  |
| **1** | 651 (54.89%) | 210 (40.15%) |  |  | 748 (51.16%) | 296 (39.89%) |  |
| **2** | 280 (23.61%) | 171 (32.70%) |  |  | 425 (29.07%) | 259 (34.91%) |  |
| **3** | 91 (7.67%) | 101 (19.31%) |  |  | 94 (6.43%) | 148 (19.95%) |  |
| **4** | 13 (1.10%) | 18 (3.44%) |  |  | 7 (0.48%) | 18 (2.43%) |  |
| **Lung function, mean ± SD** |  |  |  |  |  |  |  |
| FVC (L) | 2.33 ± 0.92 | 2.30 ± 0.88 | 0.55 |  | 2.30 ± 0.92 | 2.29 ± 0.86 | 0.80 |
| FVC% pred | 0.76 ± 0.35 | 0.81 ± 0.38 | **0.025** |  | 0.66 ± 0.29 | 0.71 ± 0.32 | **<0.001** |
| FEV1 (L) | 1.35 ± 0.75 | 1.38 ± 0.85 | 0.43 |  | 1.38 ± 1.93 | 1.35 ± 0.71 | 0.68 |
| FEV1% pred | 0.59 ± 0.81 | 0.64 ± 0.47 | 0.21 |  | 0.51 ± 0.64 | 0.55 ± 0.31 | 0.13 |
| PEF (L/S) | 2.84 ± 1.55 | 2.87 ± 1.55 | 0.70 |  | 2.76 ± 1.57 | 2.74 ± 1.41 | 0.80 |
| PEF% pred | 0.40 ± 0.22 | 0.42 ± 0.24 | 0.064 |  | 0.37 ± 0.21 | 0.38 ± 0.20 | 0.10 |
| **GOLD stage** |  |  | 0.70 |  |  |  | 0.24 |
| GOLD 1 | 119 (10.03%) | 61 (11.66%) |  |  | 157 (10.74%) | 68 (9.16%) |  |
| GOLD 2 | 667 (56.24%) | 281 (53.73%) |  |  | 797 (54.51%) | 412 (55.53%) |  |
| GOLD 3 | 300 (25.30%) | 135 (25.81%) |  |  | 367 (25.10%) | 204 (27.49%) |  |
| GOLD 4 | 100 (8.43%) | 46 (8.80%) |  |  | 141 (9.64%) | 58 (7.82%) |  |
| **Education** |  |  | **<0.001** |  |  |  | **0.042** |
| Primary school or less | 753 (63.49%) | 375 (71.70%) |  |  | 793 (54.24%) | 438 (59.03%) |  |
| Middle or high School | 375 (31.62%) | 137 (26.20%) |  |  | 600 (41.04%) | 281 (37.87%) |  |
| College and higher | 58 (4.89%) | 11 (2.10%) |  |  | 69 (4.72%) | 23 (3.10%) |  |
| **Working status** |  |  | 0.49 |  |  |  | 0.65 |
| At work | 602 (50.76%) | 256 (48.95%) |  |  | 689 (47.13%) | 342 (46.09%) |  |
| Retirement | 584 (49.24%) | 267 (51.05%) |  |  | 773 (52.87%) | 400 (53.91%) |  |
| **Biomass exposure** |  |  | 0.83 |  |  |  | 0.15 |
| No exposure | 517 (43.59%) | 225 (43.02%) |  |  | 713 (48.77%) | 386 (52.02%) |  |
| Has exposure | 669 (56.41%) | 298 (56.98%) |  |  | 749 (51.23%) | 356 (47.98%) |  |
| **Therapy** |  |  | **<0.001** |  |  |  | **<0.001** |
| Non | 649 (54.72%) | 174 (33.27%) |  |  | 795 (54.38%) | 185 (24.93%) |  |
| Inhaled dilators only | 409 (34.49%) | 266 (50.86%) |  |  | 504 (34.47%) | 433 (58.36%) |  |
| Oral medicine only | 49 (4.13%) | 37 (7.07%) |  |  | 60 (4.10%) | 25 (3.37%) |  |
| Combine inhaled and oral medicine | 79 (6.66%) | 46 (8.80%) |  |  | 103 (7.05%) | 99 (13.34%) |  |
| **Any comorbidities** |  |  | 0.89 |  |  |  | 0.40 |
| no | 651 (54.89%) | 289 (55.26%) |  |  | 806 (55.13%) | 423 (57.01%) |  |
| Yes | 535 (45.11%) | 234 (44.74%) |  |  | 656 (44.87%) | 319 (42.99%) |  |
| **Hypertension** |  |  | 0.34 |  |  |  | 0.82 |
| No | 980 (82.63%) | 422 (80.69%) |  |  | 1202 (82.22%) | 613 (82.61%) |  |
| Yes | 206 (17.37%) | 101 (19.31%) |  |  | 260 (17.78%) | 129 (17.39%) |  |
| **Asthma** |  |  | 0.55 |  |  |  | 0.32 |
| No | 1066 (89.88%) | 475 (90.82%) |  |  | 1322 (90.42%) | 661 (89.08%) |  |
| Yes | 120 (10.12%) | 48 (9.18%) |  |  | 140 (9.58%) | 81 (10.92%) |  |
| **Bronchiectasis** |  |  | 0.52 |  |  |  | **0.020** |
| No | 1089 (91.82%) | 485 (92.73%) |  |  | 1325 (90.63%) | 694 (93.53%) |  |
| Yes | 97 (8.18%) | 38 (7.27%) |  |  | 137 (9.37%) | 48 (6.47%) |  |
| **Coronary disease** |  |  | 0.10 |  |  |  | 0.20 |
| No | 1093 (92.16%) | 482 (92.16%) |  |  | 1343 (91.86%) | 693 (93.40%) |  |
| Yes | 93 (7.84%) | 41 (7.84%) |  |  | 119 (8.14%) | 49 (6.60%) |  |
| **Diabetes** |  |  | 0.68 |  |  |  | 0.38 |
| No | 1107 (93.34%) | 491 (93.88%) |  |  | 1378 (94.25%) | 706 (95.15%) |  |
| Yes | 79 (6.66%) | 32 (6.12%) |  |  | 84 (5.75%) | 36 (4.85%) |  |

*Patients were categorized by smoking status (non-smoking vs. smoking) and, within each group, further divided based on whether they experienced hospitalized acute exacerbations in the 12 months prior to baseline. Data are mean ± SD, or n (%). Student’s t-test or Mann–Whitney U test was performed for continuous variables, and χ2 test was conducted for categorical variables. COPD, chronic obstructive pulmonary disease; AE, acute exacerbation; BMI, body mass index; CAT, COPD assessment test; mMRC, Modified Medical Research Council; FEV1, forced expiratory volume in one second; FVC, forced vital capacity; PEF, peak expiratory flow; pred, predicted; GOLD, Global Initiative for Chronic Obstructive Lung Disease. *P* value < 0.05 (in bold type) denotes statistical significance.

**Supplementary Table S2 ORs from univariable logistic analysis for prior 12-month hospitalized AECOPD among COPD patients at baseline.**

| **Variables** | **With/without hospitalized AE in non-smoking COPD*** | | |  | **With/without hospitalized AE in smoking COPD*** | |
| --- | --- | --- | --- | --- | --- | --- |
|  | **OR (95%CI)** | ***P* value** |  | **OR (95%CI)** | ***P* value** |
| **Age stratification** |  |  |  |  |  |  |
| <50 |  | 1.00 (Reference) |  |  | 1.00 (Reference) |  |
| 50-59 |  | 1.71 (1.02-2.88) | **0.043** |  | 2.67 (1.43-4.97) | **0.002** |
| 60-69 |  | 2.64 (1.64-4.26) | **< 0.001** |  | 4.08 (2.26-7.38) | **< 0.001** |
| 70-79 |  | 3.20 (1.99-5.17) | **< 0.001** |  | 6.75 (3.73-12.19) | **< 0.001** |
| ≥80 |  | 5.68 (3.39-9.53) | **< 0.001** |  | 9.85 (5.28-18.36) | **< 0.001** |
| **Gender** |  |  |  |  |  |  |
| Female |  | 1.00 (Reference) |  |  | 1.00 (Reference) |  |
| Male |  | 1.42 (1.14-1.75) | **0.002** |  | 1.54 (0.90-2.65) | 0.12 |
| **BMI, kg/m2** |  |  |  |  |  |  |
| <18.5 |  | 1.33 (0.98-1.82) | 0.071 |  | 1.59 (1.23-2.06) | **< 0.001** |
| 18.5-24 |  | 1.00 (Reference) |  |  | 1.00 (Reference) |  |
| 24-28 |  | 0.52 (0.39-0.68) | **< 0.001** |  | 0.76 (0.61-0.95) | **< 0.016** |
| ≥28 |  | 0.38 (0.33-0.80) | **< 0.003** |  | 0.66 (0.42-1.05) | < 0.081 |
| **Family numbers, person** |  |  |  |  |  |  |
| 1 |  | 1.00 (Reference) |  |  | 1.00 (Reference) |  |
| 2 |  | 1.42 (0.74-2.73) | 0.29 |  | 0.59 (0.34-1.01) | 0.054 |
| 3-5 |  | 2.90 (1.53-5.49) | **0.001** |  | 1.25 (0.73-2.13) | 0.41 |
| >5 |  | 2.46 (1.22-4.95) | **0.012** |  | 1.10 (0.61-1.98) | 0.75 |
| Not reported |  | 1.72 (0.78-3.82) | 0.18 |  | 0.51 (0.23-1.09) | 0.083 |
| **Geographical region** |  |  |  |  |  |  |
| North/Northeast |  | 1.00 (Reference) |  |  | 1.00 (Reference) |  |
| Northwest |  | 2.41 (1.51-3.83) | **< 0.001** |  | 1.65 (0.96-2.83) | 0.075 |
| East |  | 9.64 (6.12-15.18) | **< 0.001** |  | 12.50 (8.10-19.30) | **< 0.001** |
| Central south |  | 3.66 (2.45-5.48) | **< 0.001** |  | 4.67 (3.21-6.79) | **< 0.001** |
| Southwest |  | 5.68 (3.44-9.39) | **< 0.001** |  | 2.65 (1.63-4.30) | **< 0.001** |
| **Residence** |  |  |  |  |  |  |
| Urban |  | 1.00 (Reference) |  |  | 1.00 (Reference) |  |
| Rural |  | 2.43 (1.86-2.93) | **< 0.001** |  | 2.22 (1.84-2.69) | **< 0.001** |
| **CAT score** |  | 1.13 (1.11-1.15) | **< 0.001** |  | 1.11 (1.10-1.13) | **< 0.001** |
| **mMRC grade** |  |  |  |  |  |  |
| **0** |  | 1.00 (Reference) |  |  | 1.00 (Reference) |  |
| **1** |  | 2.12 (1.33-3.37) | **0.002** |  | 3.54 (2.21-5.67) | **< 0.001** |
| **2** |  | 4.01 (2.49-6.47) | **< 0.001** |  | 5.46 (3.39-8.79) | **< 0.001** |
| **3** |  | 7.29 (4.32-12.28) | **< 0.001** |  | 14.10 (8.38-23.70) | **< 0.001** |
| **4** |  | 9.09 (3.93-21.00) | **< 0.001** |  | 23.02 (8.62-61.50) | **< 0.001** |
| **Lung function** |  |  |  |  |  |  |
| **FVC** |  | 0.97 (0.86-1.08) | 0.55 |  | 0.99 (0.89-1.09) | 0.80 |
| **PEF (L/S)** |  | 1.01 (0.95-1.08) | 0.69 |  | 0.99 (0.94-1.05) | 0.81 |
| **FEV1** |  | 1.05 (0.93-1.20) | 0.43 |  | 0.99 (0.92-1.05) | 0.68 |
| **PEF%, pred** |  | 1.09 (0.93-1.28) | 0.27 |  | 1.15 (0.93-1.42) | 0.21 |
| **FVC%, pred** |  | 1.37 (1.04-1.81) | **0.026** |  | 1.71 (1.28-2.30) | **< 0.001** |
| **PEF%, pred** |  | 1.52 (0.98-2.36) | 0.064 |  | 1.42 (0.94-2.16) | 0.10 |
| **GOLD stage** |  |  |  |  |  |  |
| GOLD 1 |  | 1.00 (Reference) |  |  | 1.00 (Reference) |  |
| GOLD 2 |  | 0.82 (0.59-1.15) | 0.26 |  | 1.19 (0.88-1.62) | 0.26 |
| GOLD 3 |  | 0.88 (0.61-1.27) | 0.49 |  | 1.28 (0.92-1.79) | 0.14 |
| GOLD 4 |  | 0.90 (0.56-1.43) | 0.65 |  | 0.95 (0.63-1.44) | 0.81 |
| **Education** |  |  |  |  |  |  |
| Primary school or less |  | 1.00 (Reference) |  |  | 1.00 (Reference) |  |
| Middle or high School |  | 0.73 (0.58-0.92) | **0.009** |  | 0.85 (0.71-1.02) | 0.078 |
| College and higher |  | 0.38 (0.20-0.73) | **0.004** |  | 0.60 (0.37-0.98) | **0.042** |
| **Working status** |  |  |  |  |  |  |
| Employment |  | 1.00 (Reference) |  |  | 1.00 (Reference) |  |
| Unemployment |  | 1.08 (0.88-1.32) | 0.49 |  | 1.04 (0.87-1.24) | 0.65 |
| **Biomass exposure** |  |  |  |  |  |  |
| No exposure |  | 1.00 (Reference) |  |  | 1.00 (Reference) |  |
| Has exposure |  | 1.02 (0.83-1.26) | 0.83 |  | 0.88 (0.74-1.05) | 0.15 |
| **Therapy** |  |  |  |  |  |  |
| Non |  | 1.00 (Reference) |  |  | 1.00 (Reference) |  |
| Inhaled dilators only |  | 2.43 (1.93-3.05) | **< 0.001** |  | 3.69 (3.01-4.53) | **< 0.001** |
| Oral medicine only |  | 2.82 (1.78-4.45) | **< 0.001** |  | 1.79 (1.09-2.93) | **0.021** |
| Combine inhaled and oral medicine |  | 2.17 (1.46-3.24) | **< 0.001** |  | 4.13 (3.00-5.68) | **< 0.001** |
| **Any comorbidities** |  |  |  |  |  |  |
| No |  | 1.00 (Reference) |  |  | 1.00 (Reference) |  |
| Yes |  | 0.99 (0.80-1.21) | 0.89 |  | 0.93 (0.78-1.11) | 0.40 |
| **Hypertension** |  |  |  |  |  |  |
| No |  | 1.00 (Reference) |  |  | 1.00 (Reference) |  |
| Yes |  | 1.14 (0.87-1.48) | 0.34 |  | 0.97 (0.77-1.23) | 0.82 |
| **Asthma** |  |  |  |  |  |  |
| No |  | 1.00 (Reference) |  |  | 1.00 (Reference) |  |
| Yes |  | 0.90 (0.63-1.28) | 0.55 |  | 1.16 (0.87-1.55) | 0.32 |
| **Bronchiectasis** |  |  |  |  |  |  |
| No |  | 1.00 (Reference) |  |  | 1.00 (Reference) |  |
| Yes |  | 0.88 (0.60-1.30) | 0.52 |  | 0.67 (0.48-0.94) | 0.021 |
| **Coronary disease** |  |  |  |  |  |  |
| No |  | 1.00 (Reference) |  |  | 1.00 (Reference) |  |
| Yes |  | 1.00 (0.68-1.47) | 1.00 |  | 0.80 (0.57-1.13) | 0.20 |
| **Diabetes** |  |  |  |  |  |  |
| No |  | 1.00 (Reference) |  |  | 1.00 (Reference) |  |
| Yes |  | 0.91 (0.60-1.40) | 0.68 |  | 0.84 (0.56-1.25) | 0.38 |

*Patients were categorized by smoking status (non-smoking vs. smoking) and, within each group, further divided based on whether they experienced hospitalized acute exacerbations in the 12 months prior to baseline. The ORs were estimated from univariable logistic regression model analyses. COPD, chronic obstructive pulmonary disease; AE, acute exacerbation; BMI, body mass index; CAT, COPD assessment test; mMRC, Modified Medical Research Council; FEV1, forced expiratory volume in one second; FVC, forced vital capacity; PEF, peak expiratory flow; pred, predicted; GOLD, Global Initiative for Chronic Obstructive Lung Disease; OR, odds ratio; CI, confidence interval. *P* value < 0.05 (in bold type) denotes statistical significance.

**Supplementary Table S3 Characteristics for hospitalized AE among COPD patients during one-year follow-up.**

| **Variables** | **Non-smoking COPD (n=1709)** | | |  | **Smoking COPD (n=2204)** | | |
| --- | --- | --- | --- | --- | --- | --- | --- |
| **Without hospitalized AE (n=1230, 72.0%)** | **With hospitalized AE (n=479, 28.0%)** | ***P* value** |  | **Without hospitalized AE (n=1546, 70.1%)** | **With hospitalized AE (n=658, 29.9%)** | ***P* value** |
| **Ages, years, mean ± SD** | 64.62 ± 12.14 | 70.32 ± 11.19 | **<0.001** |  | 65.48 ± 10.95 | 70.45 ± 9.49 | **<0.001** |
| **Age stratification, years，** |  |  | **<0.001** |  |  |  | **<0.001** |
| <50 | 146 (11.87%) | 18 (3.76) |  |  | 124 (8.02%) | 11 (1.67%) |  |
| 50-59 | 240 (19.51%) | 53 (11.06) |  |  | 285 (18.43%) | 81 (12.31%) |  |
| 60-69 | 395 (32.11%) | 143 (29.85) |  |  | 572 (37.00%) | 190 (28.88%) |  |
| 70-79 | 340 (27.64%) | 164 (34.24) |  |  | 433 (28.01%) | 258 (39.21%) |  |
| ≥80 | 109 (8.86%) | 101 (21.09) |  |  | 132 (8.54%) | 118 (17.93%) |  |
| **Gender** |  |  | **<0.001** |  |  |  | 0.239 |
| Male | 374 (30.41%) | 193 (40.29) |  |  | 1491 (96.44%) | 641 (97.42%) |  |
| Female | 856 (69.59%) | 286 (59.71) |  |  | 55 (3.56%) | 17 (2.58%) |  |
| **BMI, kg/m2, mean ± SD** | 23.05 ± 3.88 | 21.67 ± 3.79 | **<0.001** |  | 22.37 ± 3.32 | 21.90 ± 3.55 | **0.003** |
| **BMI stratification, kg/m2** |  |  | **<0.001** |  |  |  | 0.057 |
| <18.5 | 115 (9.35%) | 87 (18.16%) |  |  | 186 (12.03%) | 105 (15.96%) |  |
| 18.5-24 | 668 (54.31%) | 299 (62.42%) |  |  | 901 (58.28%) | 378 (57.45%) |  |
| 24-28 | 336 (27.32%) | 74 (15.45%) |  |  | 382 (24.71%) | 150 (22.80%) |  |
| ≥28 | 111 (9.02%) | 19 (3.97%) |  |  | 77 (4.98%) | 25 (3.80%) |  |
| **Family numbers, person** |  |  | **<0.001** |  |  |  | **<0.001** |
| 1 | 61 (4.96%) | 9 (1.88%) |  |  | 52 (3.36%) | 10 (1.52%) |  |
| 2 | 461 (37.48%) | 137 (28.60%) |  |  | 637 (41.20%) | 172 (26.14%) |  |
| 3-5 | 540 (43.90%) | 252 (52.61%) |  |  | 649 (41.98%) | 392 (59.57%) |  |
| >5 | 104 (8.46%) | 65 (13.57%) |  |  | 151 (9.77%) | 72 (10.94%) |  |
| Not reported | 64 (5.20%) | 16 (3.34%) |  |  | 57 (3.69%) | 12 (1.82%) |  |
| **Geographical region** |  |  | **<0.001** |  |  |  | **<0.001** |
| North/Northeast | 260 (21.14%) | 20 (4.18%) |  |  | 284 (18.37%) | 22 (3.34%) |  |
| Northwest | 251 (20.41%) | 31 (6.47%) |  |  | 152 (9.83%) | 12 (1.82%) |  |
| East | 114 (9.27%) | 117 (24.43%) |  |  | 143 (9.25%) | 121 (18.39%) |  |
| Central south | 516 (41.95%) | 260 (54.28%) |  |  | 819 (52.98%) | 462 (70.21%) |  |
| Southwest | 89 (7.24%) | 51 (10.65%) |  |  | 148 (9.57%) | 41 (6.23%) |  |
| **Residence** |  |  | **<0.001** |  |  |  | **<0.001** |
| Rural | 696 (56.59%) | 346 (72.23%) |  |  | 839 (54.27%) | 468 (71.12%) |  |
| Urban | 534 (43.41%) | 133 (27.77%) |  |  | 707 (45.73%) | 190 (28.88%) |  |
| **CAT score, mean ± SD** | 13.92 ± 7.25 | 17.77 ± 6.52 | **<0.001** |  | 14.23 ± 6.91 | 17.39 ± 6.66 | **<0.001** |
| **mMRC grade** |  |  | **<0.001** |  |  |  | **<0.001** |
| **0** | 152 (12.36%) | 22 (4.59%) |  |  | 180 (11.64%) | 29 (4.41%) |  |
| **1** | 630 (51.22%) | 231 (48.23%) |  |  | 743 (48.06%) | 301 (45.74%) |  |
| **2** | 303 (24.63%) | 148 (30.90%) |  |  | 470 (30.40%) | 214 (32.52%) |  |
| **3** | 130 (10.57%) | 62 (12.94%) |  |  | 142 (9.18%) | 100 (15.20%) |  |
| **4** | 15 (1.22%) | 16 (3.34%) |  |  | 11 (0.71%) | 14 (2.13%) |  |
| **Lung function, mean ± SD** |  |  |  |  |  |  |  |
| FVC (L) | 2.31 ± 0.92 | 2.35 ± 0.88 | 0.38 |  | 2.30 ± 0.93 | 2.30 ± 0.83 | 0.91 |
| FVC% pred | 0.76 ± 0.36 | 0.82 ± 0.37 | **0.004** |  | 0.67 ± 0.29 | 0.72 ± 0.31 | **<0.001** |
| FEV1 (L) | 1.35 ± 0.78 | 1.40 ± 0.77 | 0.20 |  | 1.39 ± 1.90 | 1.32 ± 0.64 | 0.36 |
| FEV1% pred | 0.57 ± 0.38 | 0.69 ± 1.22 | **0.033** |  | 0.52 ± 0.63 | 0.54 ± 0.27 | 0.50 |
| PEF (L/s) | 2.80 ± 1.57 | 2.98 ± 1.51 | **0.031** |  | 2.76 ± 1.56 | 2.73 ± 1.41 | 0.73 |
| PEF% pred | 0.40 ± 0.23 | 0.44 ± 0.23 | **<0.001** |  | 0.37 ± 0.21 | 0.38 ± 0.20 | 0.19 |
| **GOLD stage** |  |  | 0.86 |  |  |  | 0.61 |
| GOLD 1 | 128 (10.41%) | 52 (10.86%) |  |  | 161 (10.41%) | 64 (9.73%) |  |
| GOLD 2 | 689 (56.02%) | 259 (54.07%) |  |  | 836 (54.08%) | 373 (56.69%) |  |
| GOLD 3 | 307 (24.96%) | 128 (26.72%) |  |  | 403 (26.07%) | 168 (25.53%) |  |
| GOLD 4 | 106 (8.62%) | 40 (8.35%) |  |  | 146 (9.44%) | 53 (8.05%) |  |
| **Education** |  |  | **0.002** |  |  |  | 0.27 |
| Primary school or less | 782 (63.58%) | 346 (72.23%) |  |  | 847 (54.79%) | 384 (58.36%) |  |
| Middle or high School | 391 (31.79%) | 121 (25.26%) |  |  | 631 (40.82%) | 250 (37.99%) |  |
| College and higher | 57 (4.63%) | 12 (2.51%) |  |  | 68 (4.40%) | 24 (3.65%) |  |
| **Working status** |  |  | 0.36 |  |  |  | 0.36 |
| Employment | 609 (49.51%) | 249 (51.98%) |  |  | 733 (47.41%) | 298 (45.29%) |  |
| Unemployment | 621 (50.49%) | 230 (48.02%) |  |  | 813 (52.59%) | 360 (54.71%) |  |
| **Biomass exposure** |  |  | **<0.001** |  |  |  | **0.007** |
| No exposure | 499 (40.57%) | 243 (50.73%) |  |  | 742 (47.99%) | 357 (54.26%) |  |
| Has exposure | 731 (59.43%) | 236 (49.27%) |  |  | 804 (52.01%) | 301 (45.74%) |  |
| **Therapy** |  |  | **<0.001** |  |  |  | **<0.001** |
| Non | 673 (54.72%) | 150 (31.32%) |  |  | 800 (51.75%) | 180 (27.36%) |  |
| Inhaled dilators only | 408 (33.17%) | 267 (55.74%) |  |  | 555 (35.90%) | 382 (58.05%) |  |
| Oral medicine only | 58 (4.72%) | 28 (5.85%) |  |  | 69 (4.46%) | 16 (2.43%) |  |
| Combine inhaled and oral medicine | 91 (7.40%) | 34 (7.10%) |  |  | 122 (7.89%) | 80 (12.16%) |  |
| **Any comorbidities** |  |  | 0.14 |  |  |  | 0.060 |
| no | 663 (53.90%) | 277 (57.83%) |  |  | 842 (54.46%) | 387 (58.81%) |  |
| Yes | 567 (46.10%) | 202 (42.17%) |  |  | 704 (45.54%) | 271 (41.19%) |  |
| **Hypertension** |  |  | 0.88 |  |  |  | 0.64 |
| No | 1008 (81.95%) | 394 (82.25%) |  |  | 1277 (82.60%) | 538 (81.76%) |  |
| Yes | 222 (18.05%) | 85 (17.75%) |  |  | 269 (17.40%) | 120 (18.24%) |  |
| **Asthma** |  |  | 0.46 |  |  |  | 0.16 |
| No | 1105 (89.84%) | 436 (91.02%) |  |  | 1382 (89.39%) | 601 (91.34%) |  |
| Yes | 125 (10.16%) | 43 (8.98%) |  |  | 164 (10.61%) | 57 (8.66%) |  |
| **Bronchiectasis** |  |  | 0.17 |  |  |  | 0.23 |
| No | 1126 (91.54%) | 448 (93.53%) |  |  | 1409 (91.14%) | 610 (92.71%) |  |
| Yes | 104 (8.46%) | 31 (6.47%) |  |  | 137 (8.86%) | 48 (7.29%) |  |
| Coronary disease |  |  | 0.93 |  |  |  | 0.37 |
| No | 1134 (92.20%) | 441 (92.07%) |  |  | 1423 (92.04%) | 613 (93.16%) |  |
| Yes | 96 (7.80%) | 38 (7.93%) |  |  | 123 (7.96%) | 45 (6.84%) |  |
| Diabetes |  |  | 0.26 |  |  |  | 0.11 |
| No | 1145 (93.09%) | 453 (94.57%) |  |  | 1454 (94.05%) | 630 (95.74%) |  |
| Yes | 85 (6.91%) | 26 (5.43%) |  |  | 92 (5.95%) | 28 (4.26%) |  |
| **Hospitalizations in the previous 12 months** |  |  | **<0.001** |  |  |  | **<0.001** |
| No | 1030 (83.74%) | 156 (32.57%) |  |  | 1238 (80.08%) | 224 (34.04%) |  |
| Yes | 200 (16.26%) | 323 (67.43%) |  |  | 308 (19.92%) | 434 (65.96%) |  |

Data are mean ± SD, or n (%). Student t-test or Mann–Whitney U test was performed for continuous variables, and χ2 test was conducted for categorical variables. COPD, chronic obstructive pulmonary disease; AECOPD, acute exacerbation of COPD; BMI, body mass index; CAT, COPD assessment test; mMRC, Modified Medical Research Council; FEV1, forced expiratory volume in one second; FVC, forced vital capacity; PEF, peak expiratory flow; pred, predicted; GOLD, Global Initiative for Chronic Obstructive Lung Disease. P value < 0.05 (in bold type) denotes statistical significance.

**Supplementary Table S4 ORs from univariable logistic analysis for hospitalized AE among COPD patients during one-year follow-up.**

| **Variables** | **With/without hospitalized AE in non-smoking COPD** | |  | **With/without hospitalized AE in smoking COPD** | |
| --- | --- | --- | --- | --- | --- |
| **Adjusted OR (95%CI)** | ***P* value** |  | **Adjusted OR (95%CI)** | ***P* value** |
| **Age stratification, years，** | |  |  |  |  |
| <50 | 1.00 (Reference) |  |  | 1.00 (Reference) |  |
| 50-59 | 1.79 (1.01-3.18) | **0.046** |  | 3.20 (1.65-6.22) | **<0.001** |
| 60-69 | 2.94 (1.74-4.97) | **<0.001** |  | 3.74 (1.98-7.09) | **<0.001** |
| 70-79 | 3.91 (2.32-6.61) | **<0.001** |  | 6.72 (3.56-12.68) | **<0.001** |
| ≥80 | 7.52 (4.30-13.15) | **<0.001** |  | 10.08 (5.19-19.58) | **<0.001** |
| **Gender** |  |  |  |  |  |
| Female | 1.00 (Reference) |  |  | 1.00 (Reference) |  |
| Male | 1.54 (1.24-1.92) | **<0.001** |  | 1.39 (0.80-2.41) | 0.24 |
| **BMI stratification, kg/m2** |  |  |  |  |  |
| <18.5 | 1.69 (1.24-2.30) | **<0.001** |  | 1.35 (1.03-1.76) | **0.030** |
| 18.5-24 | 1.00 (Reference) |  |  | 1.00 (Reference) |  |
| 24-28 | 0.49 (0.37-0.66) | **<0.001** |  | 0.94 (0.75-1.17) | 0.56 |
| ≥28 | 0.38 (0.23-0.63) | **<0.001** |  | 0.77 (0.49-1.23) | 0.28 |
| **Family numbers, person** |  |  |  |  |  |
| 1 | 1.00 (Reference) |  |  | 1.00 (Reference) |  |
| 2 | 2.01 (0.98-4.16) | 0.058 |  | 1.40 (0.70-2.82) | 0.34 |
| 3-5 | 3.16 (1.55-6.47) | **0.002** |  | 3.14 (1.58-6.25) | **0.001** |
| >5 | 4.24 (1.97-9.11) | **<0.001** |  | 2.48 (1.19-5.16) | **0.015** |
| Not reported | 1.69 (0.70-4.12) | 0.25 |  | 1.09 (0.44-2.75) | 0.85 |
| **Geographical region** |  |  |  |  |  |
| North/Northeast | 1.00 (Reference) |  |  | 1.00 (Reference) |  |
| Northwest | 1.61 (0.89-2.89) | 0.12 |  | 1.02 (0.49-2.12) | 0.96 |
| East | 13.34 (7.91-22.51) | **<0.001** |  | 10.92 (6.65-17.95) | **<0.001** |
| Central south | 6.55 (4.06-10.57) | **<0.001** |  | 7.28 (4.65-11.40) | **<0.001** |
| Southwest | 7.45 (4.21-13.18) | **<0.001** |  | 3.58 (2.05-6.23) | **<0.001** |
| **Residence** |  |  |  |  |  |
| Urban | 1.00 (Reference) |  |  | 1.00 (Reference) |  |
| Rural | 2.00 (1.59-2.51) | **<0.001** |  | 2.08 (1.71-2.53) | **<0.001** |
| **CAT score, mean ± SD** | 1.08 (1.06-1.10) | **<0.001** |  | 1.07 (1.05-1.08) | **<0.001** |
| **mMRC grade** |  |  |  |  |  |
| **0** | 1.00 (Reference) |  |  | 1.00 (Reference) |  |
| **1** | 2.53 (1.58-4.06) | **<0.001** |  | 2.51 (1.66-3.81) | **<0.001** |
| **2** | 3.37 (2.07-5.50) | **<0.001** |  | 2.83 (1.85-4.32) | **<0.001** |
| **3** | 3.30 (1.92-5.65) | **<0.001** |  | 4.37 (2.74-6.98) | **<0.001** |
| **4** | 7.37 (3.20-16.97) | **<0.001** |  | 7.90 (3.27-19.08) | **<0.001** |
| **Lung function** |  |  |  |  |  |
| FVC (L) | 1.05 (0.94-1.18) | 0.39 |  | 1.01 (0.91-1.11) | 0.91 |
| FVC% pred | 1.51 (1.14-2.00) | **0.004** |  | 1.74 (1.29-2.35) | **<0.001** |
| FEV1 (L) | 1.09 (0.96-1.24) | 0.20 |  | 0.95 (0.85-1.06) | 0.38 |
| FEV1% pred | 1.53 (1.18-1.99) | **0.001** |  | 1.05 (0.90-1.23) | 0.51 |
| PEF (L/S) | 1.08 (1.01-1.15) | **0.031** |  | 0.99 (0.93-1.05) | 0.73 |
| PEF% pred | 2.16 (1.38-3.38) | **<0.001** |  | 1.34 (0.87-2.06) | 0.19 |
| **GOLD stage** |  |  |  |  |  |
| GOLD 1 | 1.00 (Reference) |  |  | 1.00 (Reference) |  |
| GOLD 2 | 0.93 (0.65-1.32) | 0.67 |  | 1.12 (0.82-1.54) | 0.47 |
| GOLD 3 | 1.03 (0.70-1.50) | 0.89 |  | 1.05 (0.75-1.47) | 0.79 |
| GOLD 4 | 0.93 (0.57-1.51) | 0.77 |  | 0.91 (0.60-1.40) | 0.68 |
| **Education** |  |  |  |  |  |
| Primary school or less | 1.00 (Reference) |  |  | 1.00 (Reference) |  |
| Middle or high School | 0.70 (0.55-0.89) | **0.004** |  | 0.87 (0.72-1.06) | 0.16 |
| College and higher | 0.48 (0.25-0.90) | **0.022** |  | 0.78 (0.48-1.26) | 0.31 |
| **Working status** | |  |  |  |  |
| At work | 1.00 (Reference) |  |  | 1.00 (Reference) |  |
| Retirement | 0.91 (0.73-1.12) | 0.36 |  | 1.09 (0.91-1.31) | 0.36 |
| **Biomass exposure** | |  |  |  |  |
| No exposure | 1.00 (Reference) |  |  | 1.00 (Reference) |  |
| Has exposure | 0.66 (0.54-0.82) | **<0.001** |  | 0.78 (0.65-0.93) | **0.007** |
| **Therapy** |  |  |  |  |  |
| Non | 1.00 (Reference) |  |  | 1.00 (Reference) |  |
| Inhaled dilators only | 2.94 (2.32-3.71) | **<0.001** |  | 3.06 (2.49-3.77) | **<0.001** |
| Oral medicine only | 2.17 (1.33-3.52) | **0.002** |  | 1.03 (0.58-1.82) | 0.92 |
| Combine inhaled and oral medicine | 1.68 (1.09-2.58) | **0.019** |  | 2.91 (2.11-4.03) | **<0.001** |
| **Any comorbidities** | |  |  |  |  |
| no | 1.00 (Reference) |  |  | 1.00 (Reference) |  |
| Yes | 0.85 (0.69-1.06) | 0.14 |  | 0.84 (0.70-1.01) | 0.06 |
| **Hypertension** |  |  |  |  |  |
| No | 1.00 (Reference) |  |  | 1.00 (Reference) |  |
| Yes | 0.98 (0.74-1.29) | 0.88 |  | 1.06 (0.83-1.34) | 0.64 |
| **Asthma** |  |  |  |  |  |
| No | 1.00 (Reference) |  |  | 1.00 (Reference) |  |
| Yes | 0.87 (0.61-1.25) | 0.46 |  | 0.80 (0.58-1.10) | 0.17 |
| **Bronchiectasis** | |  |  |  |  |
| No | 1.00 (Reference) |  |  | 1.00 (Reference) |  |
| Yes | 0.75 (0.49-1.14) | 0.17 |  | 0.81 (0.57-1.14) | 0.23 |
| **Coronary disease** | |  |  |  |  |
| No | 1.00 (Reference) |  |  | 1.00 (Reference) |  |
| Yes | 1.02 (0.69-1.51) | 0.93 |  | 0.85 (0.60-1.21) | 0.37 |
| **Diabetes** |  |  |  |  |  |
| No | 1.00 (Reference) |  |  | 1.00 (Reference) |  |
| Yes | 0.77 (0.49-1.22) | 0.27 |  | 0.70 (0.46-1.08) | 0.11 |
| **Hospitalizations in the previous 12 months** |  |  |  |  |  |
| No | 1.00 (Reference) |  |  | 1.00 (Reference) |  |
| Yes | 10.66 (8.36-13.61) | **<0.001** |  | 7.79 (6.35-9.55) | **<0.001** |

The ORs were estimated from univariable logistic regression model analyses. COPD, chronic obstructive pulmonary disease; BMI, body mass index; CAT, COPD assessment test; mMRC, Modified Medical Research Council; FEV1, forced expiratory volume in one second; FVC, forced vital capacity; PEF, peak expiratory flow; pred, predicted; GOLD, Global Initiative for Chronic Obstructive Lung Disease; OR, odds ratio; CI, confidence interval. *P* value < 0.05 (in bold type) denotes statistical significance.

**Supplementary Table S5 Characteristics for varying total LHS among COPD patients during one-year follow-up.**

| **Variables** | **Non-smoking COPD (n=1709)** | | | | |  | **Smoking COPD (n=2204)** | | | | |
| --- | --- | --- | --- | --- | --- | --- | --- | --- | --- | --- | --- |
| **Total LHS: 0 days (n=1230, 72.0%)** | **Total LHS: 1-10 days (n=274, 16.0%)** | **Total LHS: 11-20 days (n=155, 9.1%)** | **Total LHS: more than 20 days (n=50, 2.9%)** | ***P*-value** |  | **Total LHS: 0 days (n=1546, 70.1%)** | **Total LHS: 1-10 days (n=370, 16.8%)** | **Total LHS: 11-20 days (n=219, 9.9%)** | **Total LHS: more than 20 days (n=69, 3.1%)** | ***P*-value** |
| **Ages, years, mean ± SD** | 64.62 ± 12.14 | 68.56 ± 11.16 | 72.60 ± 10.92 | 72.88 ± 10.63 | **<0.001** |  | 65.48 ± 10.95 | 69.57 ± 9.59 | 71.13 ± 9.25 | 73.06 ± 9.16 | **<0.001** |
| **Age stratification, years，** |  |  |  |  | **<0.001** |  |  |  |  |  | **<0.001** |
| <50 | 146 (11.87%) | 12 (4.38%) | 4 (2.58%) | 2 (4.00%) |  |  | 124 (8.02%) | 7 (1.89%) | 3 (1.37%) | 1 (1.45%) |  |
| 50-59 | 240 (19.51%) | 38 (13.87%) | 13 (8.39%) | 2 (4.00%) |  |  | 285 (18.43%) | 57 (15.41%) | 20 (9.13%) | 4 (5.80%) |  |
| 60-69 | 395 (32.11%) | 83 (30.29%) | 46 (29.68%) | 14 (28.00%) |  |  | 572 (37.00%) | 107 (28.92%) | 64 (29.22%) | 19 (27.54%) |  |
| 70-79 | 340 (27.64%) | 102 (37.23%) | 45 (29.03%) | 17 (34.00%) |  |  | 433 (28.01%) | 142 (38.38%) | 91 (41.55%) | 25 (36.23%) |  |
| ≥80 | 109 (8.86%) | 39 (14.23%) | 47 (30.32%) | 15 (30.00%) |  |  | 132 (8.54%) | 57 (15.41%) | 41 (18.72%) | 20 (28.99%) |  |
| **Gender** |  |  |  |  | **<0.001** |  |  |  |  |  | 0.24 |
| Male | 374 (30.41%) | 101 (36.86%) | 66 (42.58%) | 26 (52.00%) |  |  | 1491 (96.44%) | 363 (98.11%) | 213 (97.26%) | 65 (94.20%) |  |
| Female | 856 (69.59%) | 173 (63.14%) | 89 (57.42%) | 24 (48.00%) |  |  | 55 (3.56%) | 7 (1.89%) | 6 (2.74%) | 4 (5.80%) |  |
| **BMI, kg/m2, mean ± SD** | 23.05 ± 3.88 | 21.83 ± 4.24 | 21.68 ± 3.03 | 20.76 ± 3.17 | **<0.001** |  | 22.37 ± 3.32 | 21.78 ± 3.69 | 22.19 ± 3.40 | 21.58 ± 3.25 | **0.009** |
| **BMI stratification, kg/m2** |  |  |  |  | **<0.001** |  |  |  |  |  | 0.37 |
| <18.5 | 115 (9.35%) | 53 (19.34%) | 21 (13.55%) | 13 (26.00%) |  |  | 186 (12.03%) | 62 (16.76%) | 31 (14.16%) | 12 (17.39%) |  |
| 18.5-24 | 668 (54.31%) | 162 (59.12%) | 108 (69.68%) | 29 (58.00%) |  |  | 901 (58.28%) | 213 (57.57%) | 126 (57.53%) | 39 (56.52%) |  |
| 24-28 | 336 (27.32%) | 42 (15.33%) | 24 (15.48%) | 8 (16.00%) |  |  | 382 (24.71%) | 81 (21.89%) | 52 (23.74%) | 17 (24.64%) |  |
| ≥28 | 111 (9.02%) | 17 (6.20%) | 2 (1.29%) | 0 (0.00%) |  |  | 77 (4.98%) | 14 (3.78%) | 10 (4.57%) | 1 (1.45%) |  |
| **Family numbers, person** |  |  |  |  | **<0.001** |  |  |  |  |  | **<0.001** |
| 1 | 61 (4.96%) | 4 (1.46%) | 5 (3.23%) | 0 (0.00%) |  |  | 52 (3.36%) | 4 (1.08%) | 5 (2.28%) | 1 (1.45%) |  |
| 2 | 461 (37.48%) | 62 (22.63%) | 51 (32.90%) | 24 (48.00%) |  |  | 637 (41.20%) | 99 (26.76%) | 61 (27.85%) | 12 (17.39%) |  |
| 3-5 | 540 (43.90%) | 147 (53.65%) | 84 (54.19%) | 21 (42.00%) |  |  | 649 (41.98%) | 205 (55.41%) | 135 (61.64%) | 52 (75.36%) |  |
| >5 | 104 (8.46%) | 50 (18.25%) | 10 (6.45%) | 5 (10.00%) |  |  | 151 (9.77%) | 53 (14.32%) | 15 (6.85%) | 4 (5.80%) |  |
| Not reported | 64 (5.20%) | 11 (4.01%) | 5 (3.23%) | 0 (0.00%) |  |  | 57 (3.69%) | 9 (2.43%) | 3 (1.37%) | 0 (0.00%) |  |
| **Geographical region** |  |  |  |  | **<0.001** |  |  |  |  |  | **<0.001** |
| North/Northeast | 260 (21.14%) | 10 (3.65%) | 9 (5.81%) | 1 (2.00%) |  |  | 284 (18.37%) | 11 (2.97%) | 9 (4.11%) | 2 (2.90%) |  |
| Northwest | 251 (20.41%) | 23 (8.39%) | 8 (5.16%) | 0 (0.00%) |  |  | 152 (9.83%) | 9 (2.43%) | 3 (1.37%) | 0 (0.00%) |  |
| East | 114 (9.27%) | 66 (24.09%) | 44 (28.39%) | 7 (14.00%) |  |  | 143 (9.25%) | 70 (18.92%) | 37 (16.89%) | 14 (20.29%) |  |
| Central south | 516 (41.95%) | 132 (48.18%) | 87 (56.13%) | 41 (82.00%) |  |  | 819 (52.98%) | 247 (66.76%) | 163 (74.43%) | 52 (75.36%) |  |
| Southwest | 89 (7.24%) | 43 (15.69%) | 7 (4.52%) | 1 (2.00%) |  |  | 148 (9.57%) | 33 (8.92%) | 7 (3.20%) | 1 (1.45%) |  |
| **Residence** |  |  |  |  | **<0.001** |  |  |  |  |  | **<0.001** |
| Rural | 696 (56.59%) | 206 (75.18%) | 106 (68.39%) | 34 (68.00%) |  |  | 839 (54.27%) | 281 (75.95%) | 141 (64.38%) | 46 (66.67%) |  |
| Urban | 534 (43.41%) | 68 (24.82%) | 49 (31.61%) | 16 (32.00%) |  |  | 707 (45.73%) | 89 (24.05%) | 78 (35.62%) | 23 (33.33%) |  |
| CAT score, mean ± SD | 13.92 ± 7.25 | 17.81 ± 6.32 | 18.31 ± 6.81 | 15.88 ± 6.48 | **<0.001** |  | 14.23 ± 6.91 | 17.79 ± 6.41 | 16.96 ± 6.82 | 16.59 ± 7.35 | **<0.001** |
| **mMRC grade** |  |  |  |  | **<0.001** |  |  |  |  |  | **<0.001** |
| 0 | 152 (12.36%) | 13 (4.74%) | 8 (5.16%) | 1 (2.00%) |  |  | 180 (11.64%) | 20 (5.41%) | 6 (2.74%) | 3 (4.35%) |  |
| 1 | 630 (51.22%) | 137 (50.00%) | 67 (43.23%) | 27 (54.00%) |  |  | 743 (48.06%) | 155 (41.89%) | 109 (49.77%) | 37 (53.62%) |  |
| 2 | 303 (24.63%) | 86 (31.39%) | 50 (32.26%) | 12 (24.00%) |  |  | 470 (30.40%) | 134 (36.22%) | 64 (29.22%) | 16 (23.19%) |  |
| 3 | 130 (10.57%) | 32 (11.68%) | 21 (13.55%) | 9 (18.00%) |  |  | 142 (9.18%) | 55 (14.86%) | 35 (15.98%) | 10 (14.49%) |  |
| 4 | 15 (1.22%) | 6 (2.19%) | 9 (5.81%) | 1 (2.00%) |  |  | 11 (0.71%) | 6 (1.62%) | 5 (2.28%) | 3 (4.35%) |  |
| **Lung function, mean ± SD** |  |  |  |  |  |  |  |  |  |  |  |
| FVC (L) | 2.31 ± 0.92 | 2.29 ± 0.82 | 2.40 ± 1.00 | 2.49 ± 0.82 | 0.33 |  | 2.30 ± 0.93 | 2.26 ± 0.81 | 2.35 ± 0.88 | 2.38 ± 0.78 | 0.62 |
| FVC% pred | 0.76 ± 0.36 | 0.82 ± 0.39 | 0.82 ± 0.37 | 0.80 ± 0.26 | 0.35 |  | 0.67 ± 0.29 | 0.72 ± 0.33 | 0.72 ± 0.29 | 0.72 ± 0.27 | **0.004** |
| FEV1 (L) | 1.35 ± 0.78 | 1.38 ± 0.77 | 1.40 ± 0.76 | 1.50 ± 0.83 | 0.43 |  | 1.39 ± 1.90 | 1.30 ± 0.58 | 1.34 ± 0.75 | 1.37 ± 0.54 | 0.80 |
| FEV1% pred | 0.57 ± 0.38 | 0.73 ± 1.58 | 0.63 ± 0.36 | 0.65 ± 0.39 | **0.008** |  | 0.52 ± 0.63 | 0.53 ± 0.25 | 0.54 ± 0.30 | 0.55 ± 0.24 | 0.92 |
| PEF (L/s) | 2.80 ± 1.57 | 2.90 ± 1.47 | 2.98 ± 1.42 | 3.38 ± 1.89 | **0.033** |  | 2.76 ± 1.56 | 2.75 ± 1.41 | 2.65 ± 1.43 | 2.90 ± 1.38 | 0.65 |
| PEF% pred | 0.40 ± 0.23 | 0.43 ± 0.23 | 0.44 ± 0.22 | 0.48 ± 0.25 | **0.003** |  | 0.37 ± 0.21 | 0.39 ± 0.20 | 0.37 ± 0.20 | 0.40 ± 0.19 | 0.35 |
| **GOLD stage** |  |  |  |  | 0.97 |  |  |  |  |  | 0.37 |
| GOLD 1 | 128 (10.41%) | 32 (11.68%) | 14 (9.03%) | 6 (12.00%) |  |  | 161 (10.41%) | 31 (8.38%) | 27 (12.33%) | 6 (8.70%) |  |
| GOLD 2 | 689 (56.02%) | 151 (55.11%) | 81 (52.26%) | 27 (54.00%) |  |  | 836 (54.08%) | 217 (58.65%) | 111 (50.68%) | 45 (65.22%) |  |
| GOLD 3 | 307 (24.96%) | 68 (24.82%) | 46 (29.68%) | 14 (28.00%) |  |  | 403 (26.07%) | 96 (25.95%) | 60 (27.40%) | 12 (17.39%) |  |
| GOLD 4 | 106 (8.62%) | 23 (8.39%) | 14 (9.03%) | 3 (6.00%) |  |  | 146 (9.44%) | 26 (7.03%) | 21 (9.59%) | 6 (8.70%) |  |
| **Education** |  |  |  |  | **0.029** |  |  |  |  |  | **<0.001** |
| Primary school or less | 782 (63.58%) | 202 (73.72%) | 108 (69.68%) | 36 (72.00%) |  |  | 847 (54.79%) | 251 (67.84%) | 104 (47.49%) | 29 (42.03%) |  |
| Middle or high School | 391 (31.79%) | 64 (23.36%) | 44 (28.39%) | 13 (26.00%) |  |  | 631 (40.82%) | 109 (29.46%) | 104 (47.49%) | 37 (53.62%) |  |
| College and higher | 57 (4.63%) | 8 (2.92%) | 3 (1.94%) | 1 (2.00%) |  |  | 68 (4.40%) | 10 (2.70%) | 11 (5.02%) | 3 (4.35%) |  |
| **Working status** |  |  |  |  | **0.045** |  |  |  |  |  | 0.16 |
| Employment | 609 (49.51%) | 148 (54.01%) | 84 (54.19%) | 17 (34.00%) |  |  | 733 (47.41%) | 180 (48.65%) | 87 (39.73%) | 31 (44.93%) |  |
| Unemployment | 621 (50.49%) | 126 (45.99%) | 71 (45.81%) | 33 (66.00%) |  |  | 813 (52.59%) | 190 (51.35%) | 132 (60.27%) | 38 (55.07%) |  |
| **Biomass exposure** |  |  |  |  | **0.002** |  |  |  |  |  | 0.064 |
| No exposure | 499 (40.57%) | 139 (50.73%) | 81 (52.26%) | 23 (46.00%) |  |  | 742 (47.99%) | 200 (54.05%) | 120 (54.79%) | 37 (53.62%) |  |
| Has exposure | 731 (59.43%) | 135 (49.27%) | 74 (47.74%) | 27 (54.00%) |  |  | 804 (52.01%) | 170 (45.95%) | 99 (45.21%) | 32 (46.38%) |  |
| **Therapy** |  |  |  |  | **<0.001** |  |  |  |  |  | **<0.001** |
| Non | 673 (54.72%) | 100 (36.50%) | 34 (21.94%) | 16 (32.00%) |  |  | 800 (51.75%) | 121 (32.70%) | 36 (16.44%) | 23 (33.33%) |  |
| Inhaled dilators only | 408 (33.17%) | 130 (47.45%) | 103 (66.45%) | 34 (68.00%) |  |  | 555 (35.90%) | 186 (50.27%) | 154 (70.32%) | 42 (60.87%) |  |
| Oral medicine only | 58 (4.72%) | 21 (7.66%) | 7 (4.52%) | 0 (0.00%) |  |  | 69 (4.46%) | 11 (2.97%) | 3 (1.37%) | 2 (2.90%) |  |
| Combine inhaled and oral medicine | 91 (7.40%) | 23 (8.39%) | 11 (7.10%) | 0 (0.00%) |  |  | 122 (7.89%) | 52 (14.05%) | 26 (11.87%) | 2 (2.90%) |  |
| **Any comorbidities** |  |  |  |  | 0.18 |  |  |  |  |  | 0.16 |
| no | 663 (53.90%) | 158 (57.66%) | 95 (61.29%) | 24 (48.00%) |  |  | 842 (54.46%) | 218 (58.92%) | 124 (56.62%) | 45 (65.22%) |  |
| Yes | 567 (46.10%) | 116 (42.34%) | 60 (38.71%) | 26 (52.00%) |  |  | 704 (45.54%) | 152 (41.08%) | 95 (43.38%) | 24 (34.78%) |  |
| **Hypertension** |  |  |  |  | 0.13 |  |  |  |  |  | 0.84 |
| No | 1008 (81.95%) | 229 (83.58%) | 130 (83.87%) | 35 (70.00%) |  |  | 1277 (82.60%) | 299 (80.81%) | 181 (82.65%) | 58 (84.06%) |  |
| Yes | 222 (18.05%) | 45 (16.42%) | 25 (16.13%) | 15 (30.00%) |  |  | 269 (17.40%) | 71 (19.19%) | 38 (17.35%) | 11 (15.94%) |  |
| **Asthma** |  |  |  |  | 0.64 |  |  |  |  |  | 0.44 |
| No | 1105 (89.84%) | 246 (89.78%) | 144 (92.90%) | 46 (92.00%) |  |  | 1382 (89.39%) | 336 (90.81%) | 200 (91.32%) | 65 (94.20%) |  |
| Yes | 125 (10.16%) | 28 (10.22%) | 11 (7.10%) | 4 (8.00%) |  |  | 164 (10.61%) | 34 (9.19%) | 19 (8.68%) | 4 (5.80%) |  |
| **Bronchiectasis** |  |  |  |  | 0.21 |  |  |  |  |  | 0.32 |
| No | 1126 (91.54%) | 252 (91.97%) | 147 (94.84%) | 49 (98.00%) |  |  | 1409 (91.14%) | 348 (94.05%) | 199 (90.87%) | 63 (91.30%) |  |
| Yes | 104 (8.46%) | 22 (8.03%) | 8 (5.16%) | 1 (2.00%) |  |  | 137 (8.86%) | 22 (5.95%) | 20 (9.13%) | 6 (8.70%) |  |
| **Coronary disease** |  |  |  |  | 0.96 |  |  |  |  |  | 0.53 |
| No | 1134 (92.20%) | 252 (91.97%) | 142 (91.61%) | 47 (94.00%) |  |  | 1423 (92.04%) | 341 (92.16%) | 206 (94.06%) | 66 (95.65%) |  |
| Yes | 96 (7.80%) | 22 (8.03%) | 13 (8.39%) | 3 (6.00%) |  |  | 123 (7.96%) | 29 (7.84%) | 13 (5.94%) | 3 (4.35%) |  |
| **Diabetes** |  |  |  |  | 0.48 |  |  |  |  |  | 0.38 |
| No | 1145 (93.09%) | 258 (94.16%) | 149 (96.13%) | 46 (92.00%) |  |  | 1454 (94.05%) | 355 (95.95%) | 208 (94.98%) | 67 (97.10%) |  |
| Yes | 85 (6.91%) | 16 (5.84%) | 6 (3.87%) | 4 (8.00%) |  |  | 92 (5.95%) | 15 (4.05%) | 11 (5.02%) | 2 (2.90%) |  |
| **Hospitalizations in the previous 12 months** |  |  |  |  | **<0.001** |  |  |  |  |  | **<0.001** |
| No | 1030 (83.74%) | 90 (32.85%) | 44 (28.39%) | 22 (44.00%) |  |  | 1238 (80.08%) | 119 (32.16%) | 83 (37.90%) | 22 (31.88%) |  |
| Yes | 200 (16.26%) | 184 (67.15%) | 111 (71.61%) | 28 (56.00%) |  |  | 308 (19.92%) | 251 (67.84%) | 136 (62.10%) | 47 (68.12%) |  |

Data are mean ± SD, or n (%). One-way ANOVA or Kruskal-Wallis test was performed for continuous variables, and χ2 test or Fisher’s exact test was conducted for categorical variables. LHS, length of hospital stay; COPD, chronic obstructive pulmonary disease; BMI, body mass index; CAT, COPD assessment test; mMRC, Modified Medical Research Council; FEV1, forced expiratory volume in one second; FVC, forced vital capacity; PEF, peak expiratory flow; pred, predicted; GOLD, Global Initiative for Chronic Obstructive Lung Disease. P-value < 0.05 (in bold type) denotes statistical significance. The bolded p-value indicates statistical significance.

**Supplementary Table S6 ORs from univariable logistic analysis for varying total LHS in non-smoking and smoking COPD patients in a12-month follow-up.**

| Variables | Prolonged total LHS in non-smoking COPD | |  | Prolonged total LHS in smoking COPD | |
| --- | --- | --- | --- | --- | --- |
| OR (95%CI) | P value |  | OR (95%CI) | P value |
| **Age stratification, years，** |  |  |  |  |  |
| <50 | 1.00 (Reference) |  |  | 1.00 (Reference) |  |
| 50-59 | 1.75 (0.99-3.10) | 0.054 |  | 3.11 (1.60-6.03) | **<0.001** |
| 60-69 | 2.96 (1.75-4.99) | **<0.001** |  | 3.78 (2.00-7.15) | **<0.001** |
| 70-79 | 3.84 (2.28-6.48) | **<0.001** |  | 6.69 (3.55-12.61) | **<0.001** |
| ≥80 | 8.32 (4.78-14.49) | **<0.001** |  | 10.42 (5.38-20.17) | **<0.001** |
| **Gender** |  |  |  |  |  |
| Female | 1.00 (Reference) |  |  | 1.00 (Reference) |  |
| Male | 1.59 (1.28-1.97) | **<0.001** |  | 1.95 (1.61-2.37) | **<0.001** |
| **BMI stratification, kg/m2** |  |  |  |  |  |
| <18.5 | 1.60 (1.19-2.16) | 0.002 |  | 1.31 (1.01-1.71) | **0.040** |
| 18.5-24 | 1.00 (Reference) |  |  | 1.00 (Reference) |  |
| 24-28 | 0.49 (0.37-0.65) | **<0.001** |  | **0.95 (0.76-1.18)** | 0.63 |
| ≥28 | 0.36 (0.22-0.60) | **<0.001** |  | **0.77 (0.49-1.23)** | 0.27 |
| **Family numbers, person** |  |  |  |  |  |
| 1 | 1.00 (Reference) |  |  | 1.00 (Reference) |  |
| 2 | 2.07 (1.01-4.27) | **0.049** |  | 1.35 (0.68-2.72) | 0.39 |
| 3-5 | 3.06 (1.50-6.26) | **0.002** |  | 3.07 (1.54-6.10) | **0.001** |
| >5 | 3.67 (1.72-7.84) | **<0.001** |  | 2.21 (1.06-4.57) | **0.033** |
| **Geographical region** |  |  |  |  |  |
| North/Northeast | 1.00 (Reference) |  |  | 1.00 (Reference) |  |
| Northwest | 1.57 (0.87-2.82) | 0.13 |  | 1.00 (0.48-2.07) | 0.99 |
| East | 12.28 (7.34-20.55) | **<0.001** |  | 10.37 (6.35-16.95) | **<0.001** |
| Central south | 6.78 (4.20-10.93) | **<0.001** |  | 7.31 (4.67-11.44) | **<0.001** |
| Southwest | 6.39 (3.64-11.20) | **<0.001** |  | 3.35 (1.93-5.82) | **<0.001** |
| **Residence** |  |  |  |  |  |
| Urban | 1.00 (Reference) |  |  | 1.00 (Reference) |  |
| Rural | 1.92 (1.53-2.41) | **<0.001** |  | 1.95 (1.61-2.37) | **<0.001** |
| **CAT score, mean ± SD** | 1.08 (1.06-1.09) | **<0.001** |  | 1.06 (1.05-1.08) | **<0.001** |
| **mMRC grade** |  |  |  |  |  |
| **0** | 1.00 (Reference) |  |  | 1.00 (Reference) |  |
| **1** | 2.53 (1.58-4.04) | **<0.001** |  | 2.60 (1.72-3.93) | **<0.001** |
| **2** | 3.32 (2.04-5.40) | **<0.001** |  | 2.77 (1.82-4.22) | **<0.001** |
| **3** | 3.38 (1.98-5.78) | **<0.001** |  | 4.32 (2.72-6.86) | **<0.001** |
| **4** | 7.69 (3.47-17.00) | **<0.001** |  | 8.46 (3.69-19.39) | **<0.001** |
| **Lung function, mean ± SD** |  |  |  |  |  |
| FVC (L) | 1.07 (0.95-1.20) | 0.26 |  | 1.02 (0.92-1.13) | 0.72 |
| FVC% pred | 1.47 (1.12-1.93) | **0.005** |  | 1.68 (1.26-2.23) | **<0.001** |
| FEV1 (L) | 1.10 (0.96-1.25) | 0.16 |  | 0.96 (0.86-1.06) | 0.43 |
| FEV1% pred | 1.13 (1.00-1.29) | 0.058 |  | 1.06 (0.90-1.24) | 0.49 |
| PEF (L/S) | 1.08 (1.02-1.16) | **0.016** |  | 0.99 (0.93-1.05) | 0.72 |
| PEF% pred | 2.20 (1.42-3.41) | **<0.001** |  | 1.31 (0.86-2.00) | 0.22 |
| **GOLD stage** |  |  |  |  |  |
| GOLD 1 | 1.00 (Reference) |  |  | 1.00 (Reference) |  |
| GOLD 2 | 0.94 (0.66-1.32) | 0.71 |  | 1.09 (0.80-1.48) | 0.61 |
| GOLD 3 | 1.06 (0.72-1.54) | 0.78 |  | 1.01 (0.72-1.42) | 0.95 |
| GOLD 4 | 0.94 (0.58-1.51) | 0.79 |  | 0.91 (0.60-1.40) | 0.68 |
| **Education** |  |  |  |  |  |
| Primary school or less | 1.00 (Reference) |  |  | 1.00 (Reference) |  |
| Middle or high School | 0.72 (0.57-0.91) | **0.006** |  | 0.96 (0.80-1.16) | 0.69 |
| College and higher | 0.47 (0.25-0.89) | **0.020** |  | 0.86 (0.53-1.38) | 0.53 |
| **Working status** |  |  |  |  |  |
| At work | 1.00 (Reference) |  |  | 1.00 (Reference) |  |
| Retirement | 0.93 (0.76-1.15) | 0.52 |  | 1.12 (0.93-1.34) | 0.23 |
| **Biomass exposure** |  |  |  |  |  |
| No exposure | 1.00 (Reference) |  |  | 1.00 (Reference) |  |
| Has exposure | 0.67 (0.55-0.83) | **<0.001** |  | 0.78 (0.65-0.94) | **0.008** |
| **Therapy** |  |  |  |  |  |
| Non | 1.00 (Reference) |  |  | 1.00 (Reference) |  |
| Inhaled dilators only | 3.07 (2.43-3.87) | **<0.001** |  | 3.18 (2.59-3.90) | **<0.001** |
| Oral medicine only | 1.99 (1.25-3.20) | **0.004** |  | 1.03 (0.58-1.80) | 0.93 |
| Combine inhaled and oral medicine | 1.62 (1.06-2.48) | **0.026** |  | 2.72 (1.98-3.72) | **<0.001** |
| **Any comorbidities** |  |  |  |  |  |
| no | 1.00 (Reference) |  |  | 1.00 (Reference) |  |
| Yes | 0.86 (0.70-1.06) | 0.16 |  | 0.84 (0.70-1.01) | 0.058 |
| **Hypertension** |  |  |  |  |  |
| No | 1.00 (Reference) |  |  | 1.00 (Reference) |  |
| Yes | 1.01 (0.77-1.33) | 0.93 |  | 1.04 (0.82-1.31) | 0.75 |
| **Asthma** |  |  |  |  |  |
| No | 1.00 (Reference) |  |  | 1.00 (Reference) |  |
| Yes | 0.85 (0.59-1.22) | 0.38 |  | 0.79 (0.58-1.08) | 0.14 |
| **Bronchiectasis** |  |  |  |  |  |
| No | 1.00 (Reference) |  |  | 1.00 (Reference) |  |
| Yes | 0.72 (0.48-1.08) | 0.11 |  | 0.85 (0.60-1.19) | 0.33 |
| **Coronary disease** |  |  |  |  |  |
| No | 1.00 (Reference) |  |  | 1.00 (Reference) |  |
| Yes | 1.01 (0.69-1.49) | 0.96 |  | 0.82 (0.58-1.17) | 0.28 |
| **Diabetes** |  |  |  |  |  |
| No | 1.00 (Reference) |  |  | 1.00 (Reference) |  |
| Yes | 0.77 (0.49-1.21) | 0.26 |  | 0.71 (0.46-1.09) | 0.12 |
| **Hospitalizations in the previous 12 months** |  |  |  |  |  |
| No | 1.00 (Reference) |  |  | 1.00 (Reference) |  |
| Yes | 9.45 (7.48-11.95) | **<0.001** |  | 6.92 (5.68-8.42) | **<0.001** |

The ORs were estimated from univariable logistic regression model analyses. LHS, length of hospital stay; COPD, chronic obstructive pulmonary disease; BMI, body mass index; CAT, COPD assessment test; mMRC, Modified Medical Research Council; FEV1, forced expiratory volume in one second; FVC, forced vital capacity; PEF, peak expiratory flow; pred, predicted; GOLD, Global Initiative for Chronic Obstructive Lung Disease; OR, odds ratio; CI, confidence interval. P value < 0.05 (in bold type) denotes statistical significance.

**Supplementary References:**

1. Miller MR, Hankinson J, Brusasco V, et al. Standardisation of spirometry. *Eur Respir J*. Aug 2005;26(2):319-38. doi:10.1183/09031936.05.00034805

2. Huang K, Zheng Z, Li W, et al. Sociodemographic correlates with prevalence of comorbidities in patients with chronic obstructive pulmonary disease: a study from a Chinese National Survey. *Lancet Reg Health West Pac*. Jan 2024;42:100937. doi:10.1016/j.lanwpc.2023.100937

3. Global Initiative for Chronic Obstructive Lung Disease. Global strategy for the diagnosis, management, and prevention of chronic obstructive pulmonary disease; 2020:2020. <www.goldcopd.org>.

4. Zhou Y, Wang C, Yao W, et al. COPD in Chinese nonsmokers. *Eur Respir J*. Mar 2009;33(3):509-18. doi:10.1183/09031936.00084408
